# Supplementary material
Source: publisher site journal article supplement (https://www.spandidos-publications.com/3363/downloadSupplementary)
Supplement: Supplementary file 1 [file downloadSupplementary]

Table SI. Age groups of participants included in the present study.

| Age groups, years | Number of patients, n | Percentage, % |
|-------------------|-----------------------|---------------|
| 0-7               | 65                    | 75.58         |
| 8-15              | 16                    | 18.60         |
| >15               | 5                     | 5.81          |

Table SII. Population demographics and distribution of the ages of diagnosis in years.

| Groups | Number of patients, n | Percentage, % | Age at diagnosis, years |      |      |
|--------|-----------------------|---------------|-------------------------|------|------|
|        |                       |               | Median                  | Mean | SD   |
| Sex    |                       |               |                         |      |      |
| Male   | 51                    | 59.3          | 4.33                    | 5.82 | 4.11 |
| Female | 35                    | 40.7          | 4.16                    | 4.99 | 3.76 |
| Total  | 86                    | 100.0         | 4.29                    | 5.48 | 3.96 |

Table SIII. Genotype rates of *CYP1A1*, *CXCL12* and *TP53* for controls and patients with ALL using Fisher's exact test for *CYP1A1*.

| Gene          | Patient |    |       | Statistical analysis           |
|---------------|---------|----|-------|--------------------------------|
|               | 0       | 1  | Total |                                |
| <i>CYP1A1</i> |         |    |       | P<0.001 <sup>a,b</sup>         |
| AA            | 105     | 51 | 156   |                                |
| AG            | 19      | 33 | 52    |                                |
| GG            | 1       | 0  | 1     |                                |
| Total         | 125     | 84 | 209   |                                |
| <i>CXCL12</i> |         |    |       | $\chi^2=4.154$ ; df=2; P=0.125 |
| AA            | 16      | 9  | 25    |                                |
| AG            | 55      | 50 | 105   |                                |
| GG            | 49      | 24 | 73    |                                |
| Total         | 120     | 83 | 203   |                                |
| <i>TP53</i>   |         |    |       | $\chi^2=4.565$ ; df=2; P=0.102 |
| Arg/Arg       | 64      | 35 | 99    |                                |
| Arg/Pro       | 47      | 37 | 84    |                                |
| Pro/Pro       | 10      | 14 | 24    |                                |
| Total         | 121     | 86 | 207   |                                |

Fisher's exact test was used for the analysis of the *CYP1A1* group, while  $\chi^2$  was performed for the *CXCL12* and *TP53* groups. <sup>a</sup>P<0.05; <sup>b</sup>two-tailed Fisher's exact test. 0, control; 1, ALL; ALL, acute lymphoblastic leukemia; *CXCL12*, C-X-C motif chemokine ligand 12; *CYP1A1*, CYP1 subfamily A member 1; Arg, Arginine; Pro, Proline; AA, wild-type genotype; AG, heterozygous for the major allele; GG, homozygous for the minor allele; df, degrees of freedom.
